# Supplementary material for: Dataset size and composition impact the reliability of performance benchmarks for peptide-MHC binding predictions
Source: PubMed Central journal article supplement (PMC4111843; doi:10.1186/1471-2105-15-241), 2014-07-14
Supplement: 12859_2014_6509_MOESM1_ESM.pdf [file 12859_2014_6509_MOESM1_ESM.pdf]

1 **Supplementary figures/tables for:**

2 Dataset size and composition impact the reliability of performance benchmarks for peptide-  
3 MHC binding predictions

4 **Authors**

5 Yohan Kim<sup>a</sup>, John Sidney<sup>a</sup>, Soren Buus<sup>b</sup>, Alessandro Sette<sup>a</sup>, Morten Nielsen<sup>c,d</sup>, Bjoern Peters<sup>a</sup>

6

7 <sup>a</sup>La Jolla Institute for Allergy & Immunology

8 9420 Athena Circle

9 La Jolla, CA 92037, USA

10 <sup>b</sup>University of Copenhagen

11 Department of International Health, Immunology and Microbiology

12 Blegdamsvej 3

13 2200 København N

14 <sup>c</sup>Center for Biological Sequence Analysis

15 Department of Systems Biology

16 The Technical University of Denmark

17 Building 208, DK-2800 Lyngby Denmark

18 <sup>d</sup>Instituto de Investigaciones Biotecnológicas,

19 Universidad Nacional de San Martín,

20 San Martín, B 1650 HMP,

21 Buenos Aires, Argentina

1

2 **Corresponding author**

3 Bjoern Peters

4 email: bpeters@liai.org

5 Tel: 858/752-6914

6 Fax: 858/752-6987

7

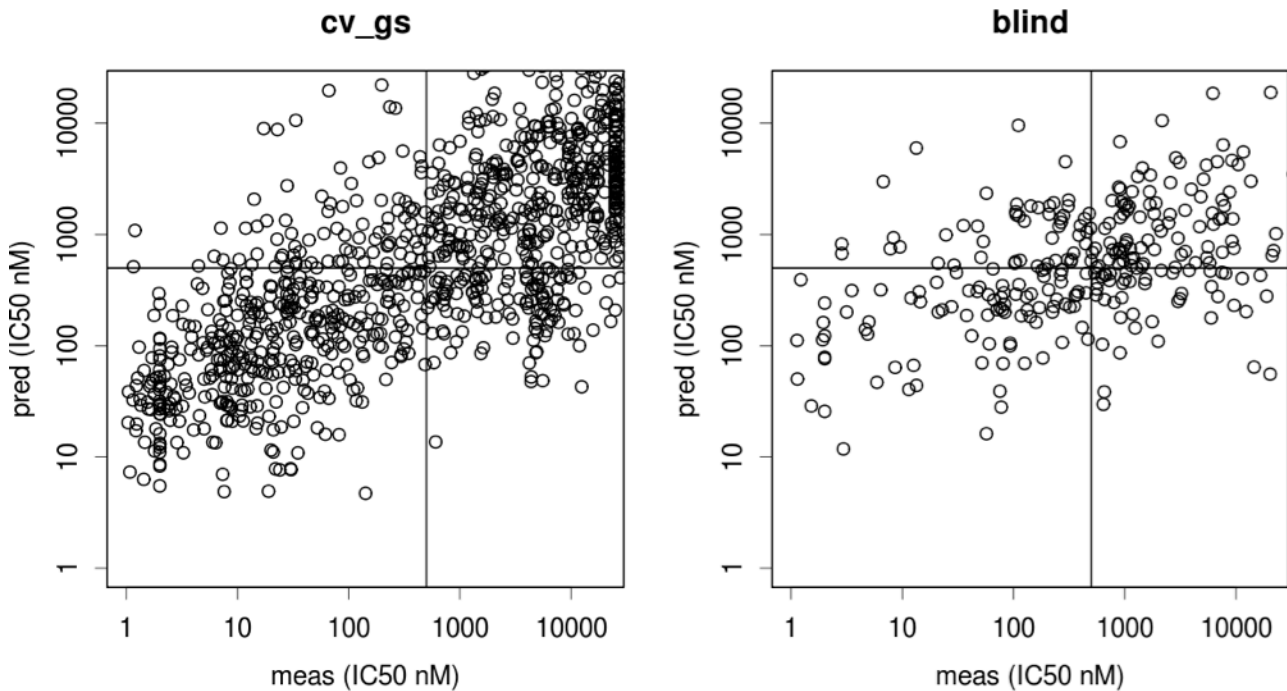

8

9 **FIGURE S1. Scatter plots of measured and predicted affinities for cross-validated and**  
10 **blind predictions for the 9-mer data set of H-2 Db. Vertical and horizontal lines indicate**  
11 **cutoffs at the 500 nM threshold that distinguishes binders from non-binders.**

12

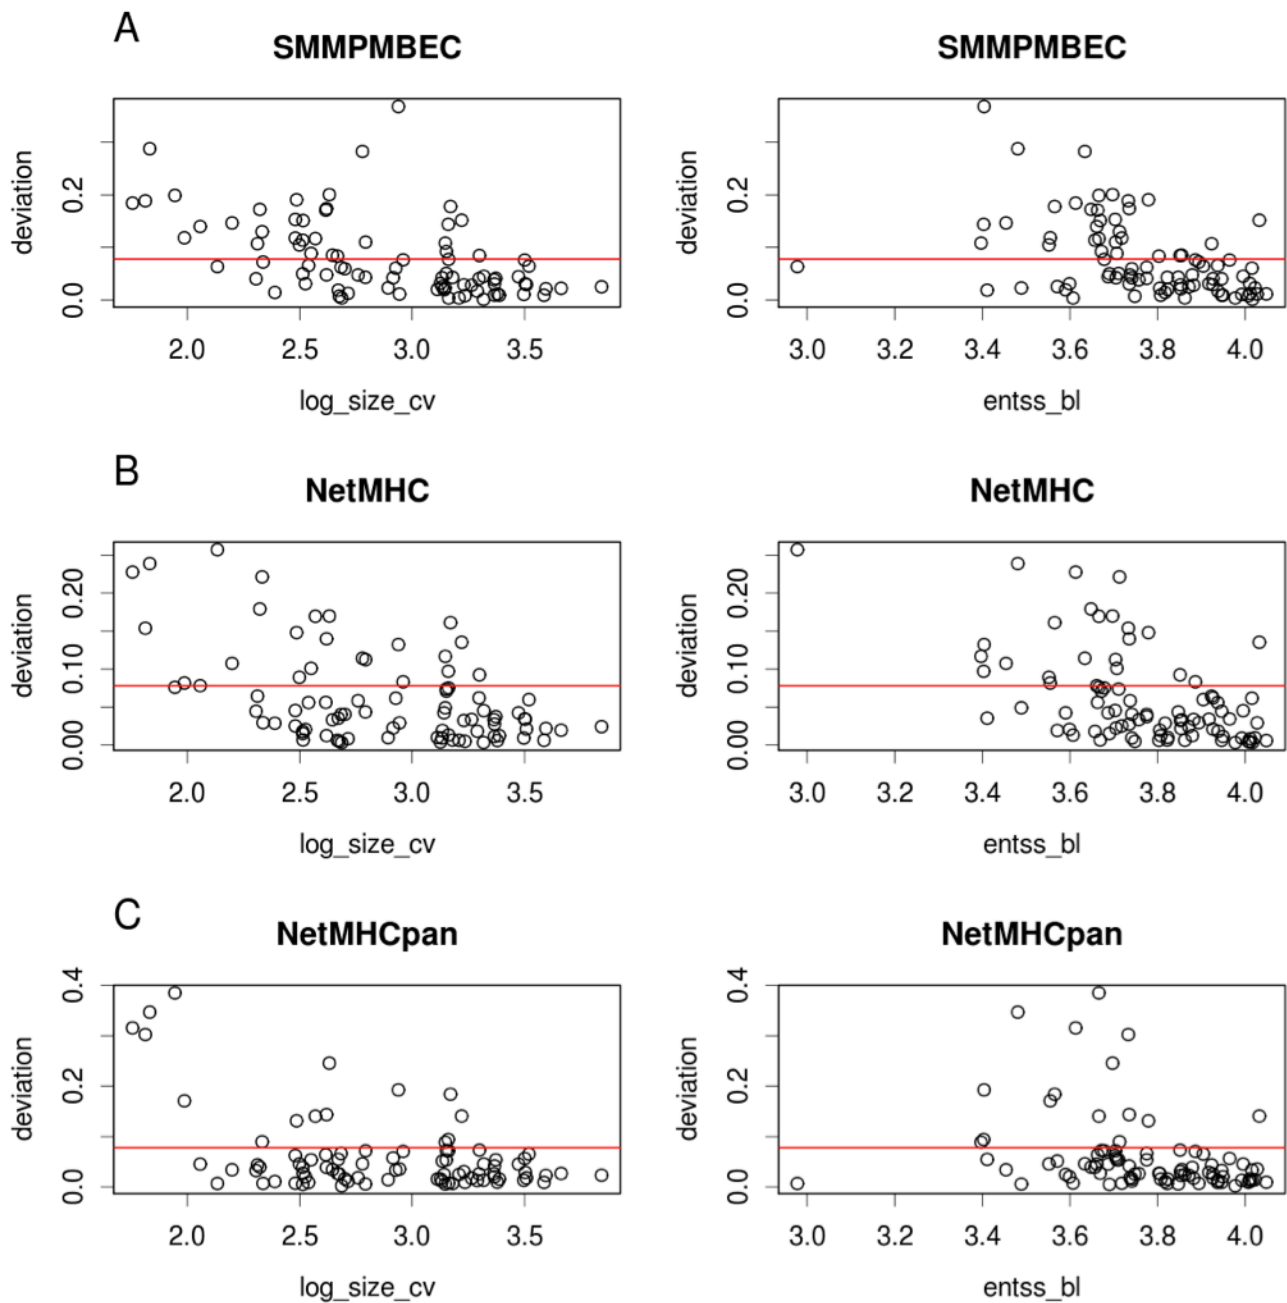

1

2 **FIGURE S2. Correlations of deviation of cross-validated prediction with either data set**  
 3 **size (i.e. *log\_size\_cv*) or entropy of sequence space (i.e. *entss\_bl*). Here, ‘deviation’ is**  
 4 **defined as ‘ $|cv\_gs - blind|$ ’. Red lines represent the class boundary used for the**  
 5 **logistic regression modeling.**

6

1 **TABLE S1. Average predictive performances of the three methods against *cv\_rnd*,**  
 2 ***cv\_sr*, *cv\_gs*, and *blind* benchmark data sets as Areas under ROC curves. For each**  
 3 **benchmark data type, highest performance is indicated with bold font.**

| Method               | cv_rnd        | cv_sr         | cv_gs         | blind         |
|----------------------|---------------|---------------|---------------|---------------|
| SMM <sup>PMBEC</sup> | 0.8989        | 0.8927        | 0.9025        | 0.8474        |
| NetMHC               | 0.8930        | 0.8892        | 0.8919        | <b>0.8833</b> |
| NetMHCpan            | <b>0.9176</b> | <b>0.9149</b> | <b>0.9147</b> | 0.8830        |

4

5 **TABLE S2. Mean of differences in AROCs between predictive performances generated**  
 6 **with cross-validations and those against blind data sets. Here, a ‘difference’ is defined**  
 7 **as (*cv* – *blind*). Hence, positive values indicate over-estimations. In column ‘P-values:**  
 8 **one sample’, statistical significances of over-estimations are shown (one-sided t-test).**  
 9 **In column ‘P-values: two sample’, significances of differences in means with respect to**  
 10 ***cv\_rnd* for the two cross-validation strategies are shown (paired, one-sided t-tests). In**  
 11 **column ‘P-values: two sample, absolute value’, statistical significances of**  
 12 **improvements in estimations of blind predictive performances of either *cv\_sr* or *cv\_gs***  
 13 **with respect to *cv\_rnd* were calculated by comparing their absolute differences (paired,**  
 14 **one-sided t-tests).**

15

16

17

18

19

1  
2  
3  
4  
5  
6  
7  
8  
9  
10  
11  
12  
13  
14  
15  
16  
17  
18  
19  
20

| Method               | Means: (cv – blind) |        |        | P-values: one sample |         |         | P-values: two sample |                |               | P-values: two sample, absolute value |                  |                 |
|----------------------|---------------------|--------|--------|----------------------|---------|---------|----------------------|----------------|---------------|--------------------------------------|------------------|-----------------|
|                      | cv_rnd              | cv_sr  | cv_gs  | cv_rnd               | cv_sr   | cv_gs   | cv_rnd & cv_sr       | cv_rnd & cv_gs | cv_sr & cv_gs | cv_rnd  &  cv_sr                     | cv_rnd  &  cv_gs | cv_sr  &  cv_gs |
| SMM <sup>PMBEC</sup> | 0.0513              | 0.0456 | 0.0475 | 1.5E-06              | 1.5E-05 | 3.0E-06 | 2.1E-03              | 2.5E-02        | 2.1E-03       | 0.28                                 | 0.13             | 0.13            |
| NetMHC               | 0.0097              | 0.0059 | 0.0086 | 3.0E-01              | 5.3E-01 | 3.5E-01 | 1.1E-01              | 3.2E-01        | 1.1E-01       | 0.53                                 | 0.52             | 0.52            |
| NetMHCpan            | 0.0346              | 0.0318 | 0.0317 | 6.0E-04              | 1.8E-03 | 2.0E-03 | 3.5E-03              | 3.8E-05        | 3.5E-03       | 0.38                                 | 0.39             | 0.39            |

1  
2  
3  
4  
5  
6  
7  
8  
9  
10  
11

**TABLE S3. Leave one out cross-validation predictive performances for each logistic regression model using a pair of features for SMM<sup>PMBEC</sup>. Performances are in AROCs.**

| Features    | log_size_cv | log_size_bl | entss_cv | entss_bl | ent_pred_cv | ent_pred_bl | ent_meas_cv | ent_meas_bl | prbol_pred | prbol_meas |
|-------------|-------------|-------------|----------|----------|-------------|-------------|-------------|-------------|------------|------------|
| log_size_cv | 0.78        | 0.78        | 0.78     | 0.84     | 0.77        | 0.78        | 0.81        | 0.79        | 0.80       | 0.78       |
| log_size_bl | --          | 0.76        | 0.76     | 0.76     | 0.74        | 0.77        | 0.73        | 0.74        | 0.73       | 0.72       |
| entss_cv    | --          | --          | 0.75     | 0.77     | 0.74        | 0.76        | 0.73        | 0.73        | 0.75       | 0.75       |
| entss_bl    | --          | --          | --       | 0.78     | 0.78        | 0.78        | 0.76        | 0.78        | 0.77       | 0.77       |
| ent_pred_cv | --          | --          | --       | --       | 0.53        | 0.63        | 0.71        | 0.54        | 0.64       | 0.53       |
| ent_pred_bl | --          | --          | --       | --       | --          | 0.66        | 0.73        | 0.68        | 0.69       | 0.64       |
| ent_meas_cv | --          | --          | --       | --       | --          | --          | 0.48        | 0.45        | 0.65       | 0.48       |
| ent_meas_bl | --          | --          | --       | --       | --          | --          | --          | 0.31        | 0.62       | 0.43       |

|            |    |    |    |    |    |    |    |    |      |      |
|------------|----|----|----|----|----|----|----|----|------|------|
| prbol_pred | -- | -- | -- | -- | -- | -- | -- | -- | 0.64 | 0.63 |
| prbol_meas | -- | -- | -- | -- | -- | -- | -- | -- | --   | 0.47 |

1

2 **TABLE S4. Leave one out cross-validation predictive performances for each logistic**  
3 **regression model using a pair of features for NetMHC. Performances are in AROCs.**

| Features    | log_size_cv | log_size_bl | entss_cv | entss_bl | ent_pred_cv | ent_pred_bl | ent_meas_cv | ent_meas_bl | prbol_pred | prbol_meas |
|-------------|-------------|-------------|----------|----------|-------------|-------------|-------------|-------------|------------|------------|
| log_size_cv | 0.73        | 0.75        | 0.76     | 0.83     | 0.71        | 0.73        | 0.74        | 0.73        | 0.73       | 0.74       |
| log_size_bl | --          | 0.70        | 0.75     | 0.79     | 0.72        | 0.74        | 0.69        | 0.69        | 0.69       | 0.70       |
| entss_cv    | --          | --          | 0.75     | 0.80     | 0.74        | 0.74        | 0.74        | 0.74        | 0.75       | 0.76       |
| entss_bl    | --          | --          | --       | 0.79     | 0.78        | 0.78        | 0.78        | 0.78        | 0.78       | 0.78       |
| ent_pred_cv | --          | --          | --       | --       | 0.49        | 0.57        | 0.67        | 0.54        | 0.59       | 0.59       |
| ent_pred_bl | --          | --          | --       | --       | --          | 0.60        | 0.65        | 0.65        | 0.63       | 0.63       |
| ent_meas_cv | --          | --          | --       | --       | --          | --          | 0.39        | 0.29        | 0.58       | 0.54       |
| ent_meas_bl | --          | --          | --       | --       | --          | --          | --          | 0.31        | 0.58       | 0.54       |
| prbol_pred  | --          | --          | --       | --       | --          | --          | --          | --          | 0.61       | 0.59       |
| prbol_meas  | --          | --          | --       | --       | --          | --          | --          | --          | --         | 0.57       |

4

5

6 **TABLE S5. Leave one out cross-validation predictive performances for each logistic**  
7 **regression model using a pair of features for NetMHCpan. Performances are in AROCs.**

| Features    | log_size_cv | log_size_bl | entss_cv | entss_bl | ent_pred_cv | ent_pred_bl | ent_meas_cv | ent_meas_bl | prbol_pred | prbol_meas |
|-------------|-------------|-------------|----------|----------|-------------|-------------|-------------|-------------|------------|------------|
| log_size_cv | 0.69        | 0.68        | 0.72     | 0.76     | 0.64        | 0.73        | 0.68        | 0.66        | 0.67       | 0.68       |
| log_size_bl | --          | 0.62        | 0.72     | 0.72     | 0.64        | 0.71        | 0.60        | 0.59        | 0.59       | 0.59       |
| entss_cv    | --          | --          | 0.73     | 0.76     | 0.72        | 0.75        | 0.72        | 0.72        | 0.72       | 0.75       |
| entss_bl    | --          | --          | --       | 0.73     | 0.74        | 0.73        | 0.72        | 0.72        | 0.69       | 0.71       |
| ent_pred_cv | --          | --          | --       | --       | 0.51        | 0.64        | 0.60        | 0.53        | 0.56       | 0.59       |
| ent_pred_bl | --          | --          | --       | --       | --          | 0.69        | 0.70        | 0.70        | 0.70       | 0.71       |
| ent_meas_cv | --          | --          | --       | --       | --          | --          | 0.00        | 0.00        | 0.52       | 0.48       |
| ent_meas_bl | --          | --          | --       | --       | --          | --          | --          | 0.00        | 0.52       | 0.46       |
| prbol_pred  | --          | --          | --       | --       | --          | --          | --          | --          | 0.56       | 0.50       |
| prbol_meas  | --          | --          | --       | --       | --          | --          | --          | --          | --         | 0.51       |

1

2

3
